# Supplementary material
Source: PubMed Central journal article supplement (PMC3906864)
Supplement: bi401484a_si_001.pdf [file bi401484a_si_001.pdf]

**NMR Localization of Divalent Cations at the Active Site of the *Neurospora* VS  
Ribozyme Provides Insights Into RNA-Metal Ion Interactions**

Eric Bonneau and Pascale Legault

Département de Biochimie et Médecine Moléculaire, Université de Montréal, C.P. 6128,  
Succursale Centre-Ville, Montréal, QC, Canada, H3C 3J7

**Supporting Information**

## Supporting Figures

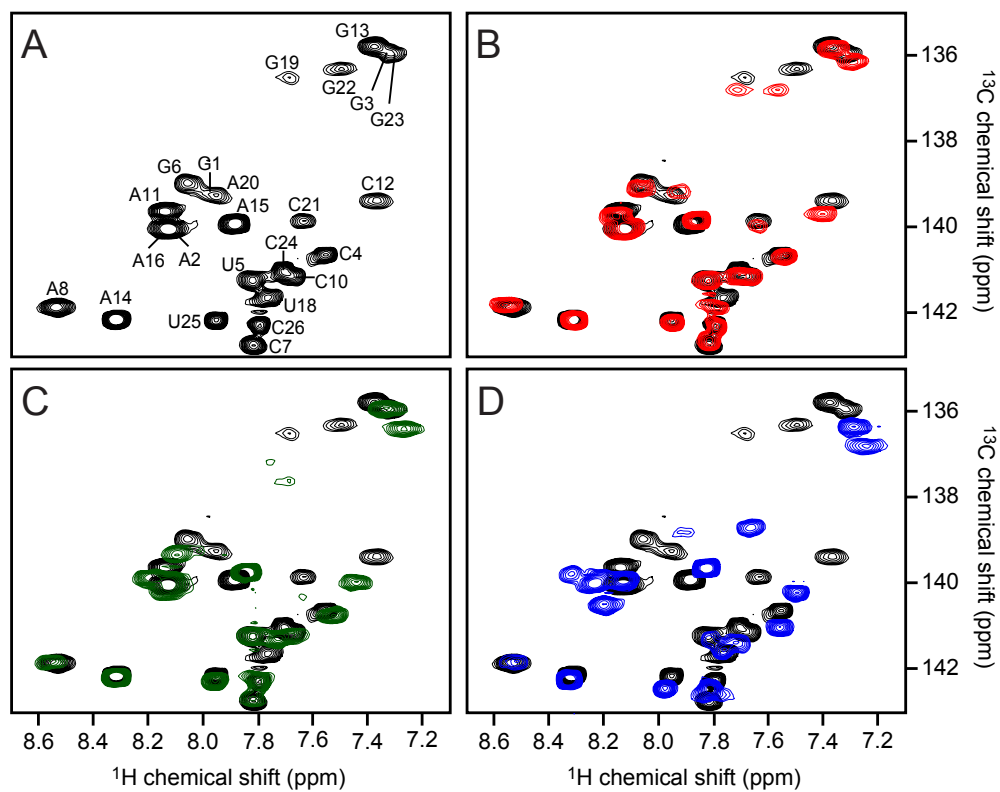

**Figure S1.** Effect of  $\text{Cd}^{2+}$  ions on SLVI RNA. Comparison of the H6/H8-C6/C8 region of 2D  $^1\text{H}$ - $^{13}\text{C}$  CT-HSQC spectra of SLVI at selected points of the  $\text{Cd}^{2+}$  titration. (A)-(D) Spectra are shown for  $\text{CdCl}_2$ : $\text{MgCl}_2$  concentrations of (A)-(D) 0.0:5.0 mM (black), (B) 0.25 mM:4.75 mM (red), (C) 1 mM:4 mM (green), and (D) 4 mM:1mM (purple).

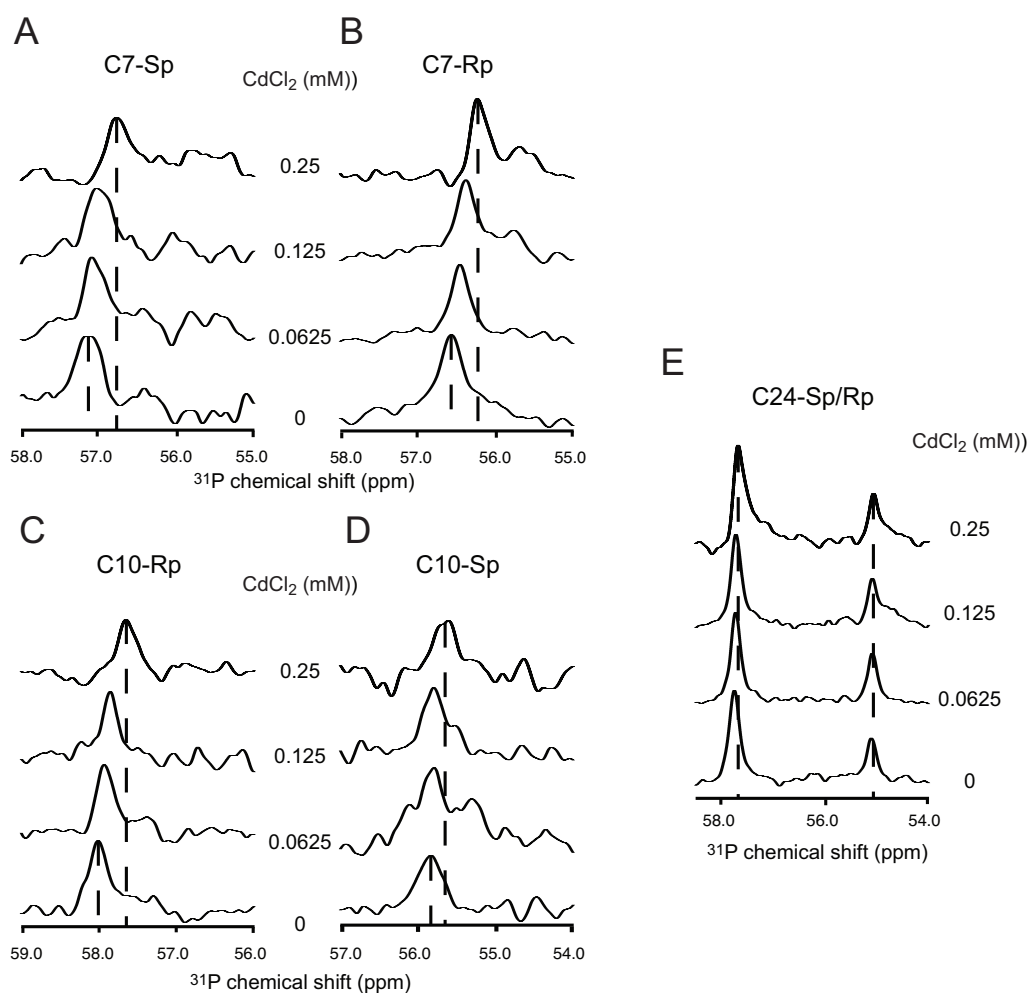

**Figure S2.** Effect of the addition of  $\text{Cd}^{2+}$  ions on the  $^{31}\text{P}$  NMR spectrum of selected SLVI RNAs containing single phosphorothioate modifications. The 1D  $^{31}\text{P}$  NMR spectra of (A) SLVI-C7-S<sub>p</sub>, (B) SLVI-C7-R<sub>p</sub>, (C) SLVI-C10-R<sub>p</sub>, (D) SLVI-C10-S<sub>p</sub> and (E) SLVI-C24-S<sub>p</sub>/R<sub>p</sub> were collected in buffer containing  $\text{CdCl}_2$ : $\text{MgCl}_2$  concentrations of 0.0:5.0, 0.0625:4.9375, 0.125:4.875 and 0.25:4.75 mM. Only the most downfield region of the spectra containing the signal from the phosphorothioate is shown.

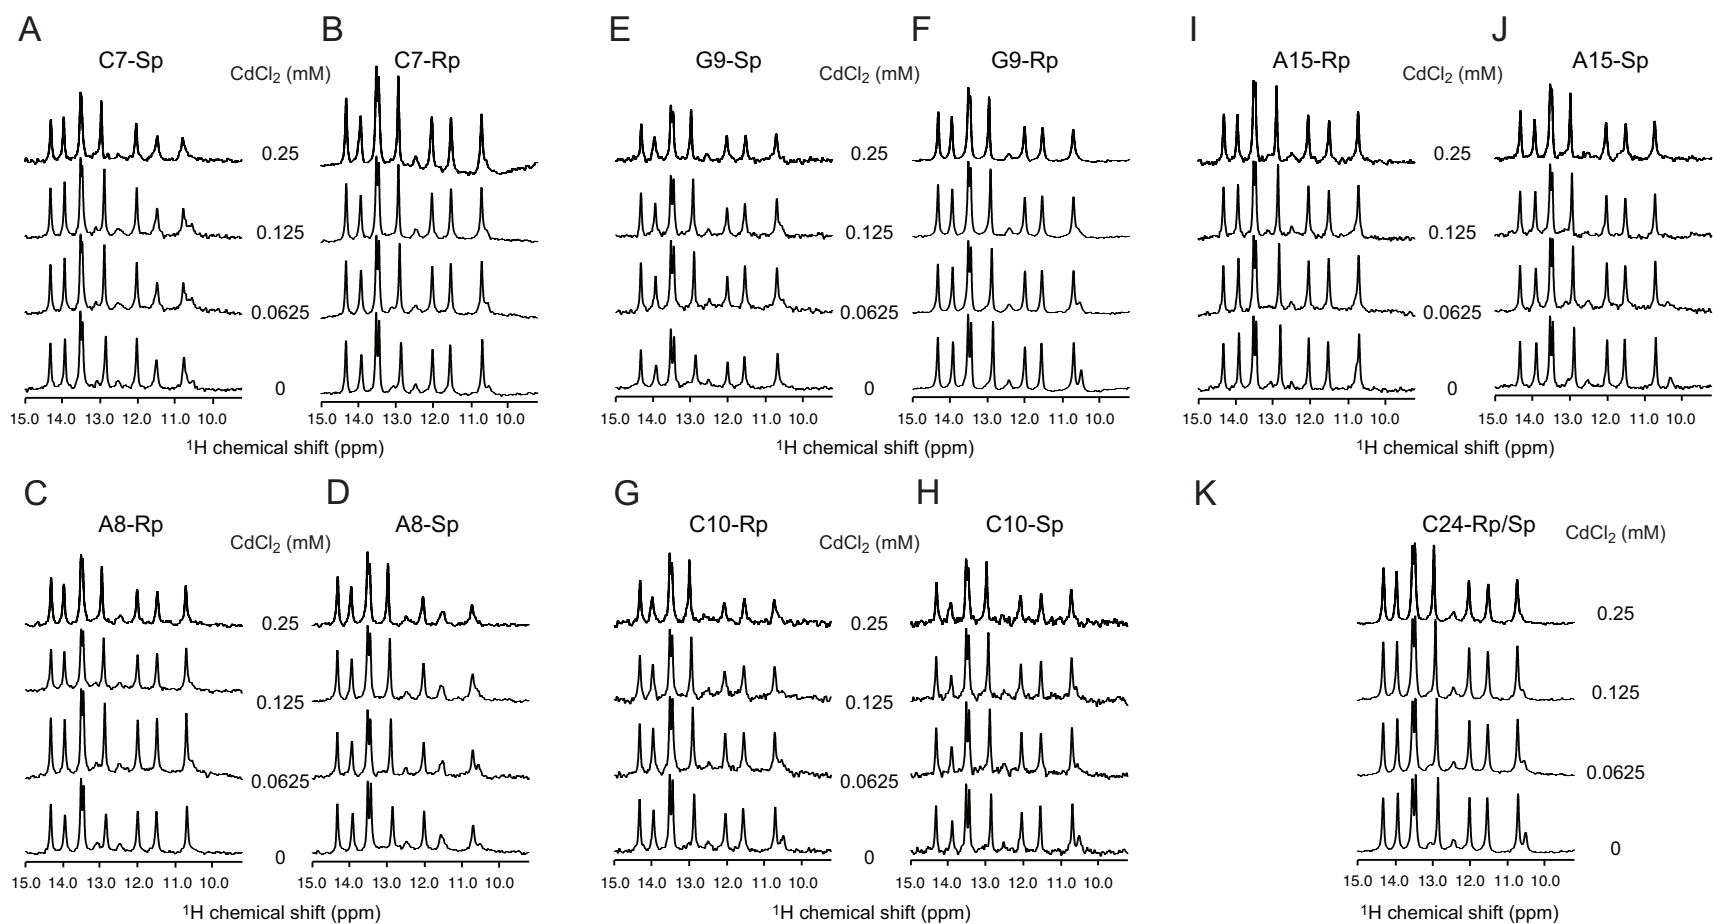

**Figure S3.** Effect of the addition of  $\text{Cd}^{2+}$  on the imino region of the  $^1\text{H}$  NMR spectra of SLVI RNAs containing single phosphorothioate modifications. The 1D  $^1\text{H}$  spectra of (A) SLVI-C7-S<sub>p</sub>, (B) SLVI-C7-R<sub>p</sub>, (C) SLVI-A8-R<sub>p</sub>, (D) SLVI-A8-S<sub>p</sub>, (E) SLVI-G9-S<sub>p</sub>, (F) SLVI-G9-R<sub>p</sub>, (G) SLVI-C10-S<sub>p</sub>, (H) SLVI-C10-R<sub>p</sub> (I) SLVI-A15-R<sub>p</sub>, (J) SLVI-A15-S<sub>p</sub>, and (K) SLVI-C24-S<sub>p</sub>/R<sub>p</sub> were collected in buffer containing  $\text{CdCl}_2$ : $\text{MgCl}_2$  concentrations of 0.0:5.0, 0.0625:4.9375, 0.125:4.875 and 0.25:4.75 mM.

## Supporting Tables

**Table S1.** Distance restraints derived from Mn<sup>2+</sup>-induced PRE.

| Site        | Atoms           | I <sub>0</sub> /I <sub>Mn</sub> | Restraint  |
|-------------|-----------------|---------------------------------|------------|
| Site 1      | G13 N1-H1       | 51                              | 1.8-7.0 Å  |
|             | G13 C8-H8       | 20                              | 1.8-7.0 Å  |
|             | G13 C3'-H3'     | 8                               | 1.8-7.0 Å  |
|             | A16 N7          | 9                               | 1.8-7.0 Å  |
|             | A14 H3'         | 6                               | 1.8-8.0 Å  |
|             | A14 H5' or H5'' | 5                               | 1.8-8.0 Å  |
|             | A15 N7          | 6                               | 1.8-8.0 Å  |
|             | A16 H3'         | 5                               | 1.8-8.0 Å  |
|             | A16 N9          | 4                               | 1.8-8.0 Å  |
|             | A15 N9          | 7                               | 1.8-8.0 Å  |
| Site 1 or 2 | C12 H6          | 7.5                             | 1.8-10.0 Å |
|             | C12 H5          | 6                               | 1.8-10.0 Å |
|             | G17 H8          | 6                               | 1.8-10.0 Å |
|             | G17 H1          | 5                               | 1.8-10.0 Å |
|             | C12 H41         | 5                               | 1.8-10.0 Å |
|             | C12 H42         | 5                               | 1.8-10.0 Å |
|             | G17 H5' or H5'' | 5                               | 1.8-10.0 Å |
| Site 2      | A11 N7          | 14                              | 1.8-7.0 Å  |
|             | U18 C5-H5       | 8.5                             | 1.8-7.0 Å  |
|             | C10 N4-H42      | 8                               | 1.8-7.0 Å  |
|             | C10 N4-H41      | 6                               | 1.8-8.0 Å  |
|             | G19 H8          | 7.5                             | 1.8-8.0 Å  |
|             | C10 H41         | 6                               | 1.8-8.0 Å  |
|             | A11 N9          | 5                               | 1.8-8.0 Å  |
|             | A11 H8          | 4                               | 1.8-8.0 Å  |
|             | G17 H3'         | 4                               | 1.8-8.0 Å  |
|             | U18 H3          | 4                               | 1.8-8.0 Å  |
| Site 2 or 3 | G9 H8           | 4                               | 1.8-10.0 Å |
| Site 3      | G6 H2'          | 6                               | 1.8-8.0 Å  |
|             | A8 H8           | 5                               | 1.8-8.0 Å  |
|             | A8 H3'          | 4                               | 1.8-8.0 Å  |
|             | A8 H4'          | 4                               | 1.8-8.0 Å  |
|             | A8 N9           | 4                               | 1.8-8.0 Å  |
| Site 3 or 4 | G6 H8           | 5                               | 1.8-10.0 Å |
| Site 4      | G23 N7          | 15                              | 1.8-7.0 Å  |
|             | G23 C8-H8       | 12                              | 1.8-7.0 Å  |
|             | G22 C8-H8       | 9                               | 1.8-7.0 Å  |
|             | U5 N3-H3        | 9                               | 1.8-7.0 Å  |
|             | G6 N1-H1        | 8                               | 1.8-7.0 Å  |
|             | A20 N7          | 5                               | 1.8-8.0 Å  |
| Site 4 or 5 | U5 H5           | 4                               | 1.8-8.0 Å  |
|             | G3 N9           | 6                               | 1.8-10.0 Å |
|             | C24 H42         | 5                               | 1.8-10.0 Å |
|             | C21 H5          | 5                               | 1.8-10.0 Å |
| Site 5      | C4 H41          | 4                               | 1.8-10.0 Å |
|             | G3 N7           | 15                              | 1.8-7.0 Å  |
|             | G1 C8-H8        | 13                              | 1.8-7.0 Å  |
|             | C26 H41         | 6                               | 1.8-8.0 Å  |
|             | A2 N7           | 5                               | 1.8-8.0 Å  |
|             | A2 H8           | 4                               | 1.8-8.0 Å  |

**Table S2.** Results from the WebFR3D motif search.

| Site                 | Searched motif <sup>a</sup>                       | Number of raw hits <sup>b</sup> | Number of hits with a cation <sup>b</sup> | Number of positive hits <sup>b</sup> | PDB entry (positive hits)                                                                                            | Residues (positive hits)                                                                                                                              | Metal ion <sup>c</sup> (positive hits)                                             |
|----------------------|---------------------------------------------------|---------------------------------|-------------------------------------------|--------------------------------------|----------------------------------------------------------------------------------------------------------------------|-------------------------------------------------------------------------------------------------------------------------------------------------------|------------------------------------------------------------------------------------|
| Site 1               | NR<br>G — A<br>C — G<br>5' 3'                     | 111                             | 13                                        | 3                                    | <b>3U5F</b><br><b>1FJG</b><br><b>1JTW</b>                                                                            | 1121-1126<br>897-902<br>6-11                                                                                                                          | Mg 2162<br>Mg 1586<br>Na 25                                                        |
| Site 2               | 3' 5'<br>C — G<br>A — U<br>C — G<br>5' 3'         | 173                             | 18                                        | 8                                    | <b>3U5H</b><br><b>3U5H</b><br><b>2ZNI</b><br><b>3V2F</b><br><b>3V2F</b><br><b>3V2F</b><br><b>3V7E</b><br><b>3BNL</b> | 1183-1185/1321-1323<br>1497-1499/1517-1519<br>26-28/42-44<br>589-591/666-668<br>414-416/2407-2409<br>2678-2680/2727-2729<br>48-50/85-87<br>8-10/13-15 | Mg 4027<br>Mg 3997<br>Ca 82<br>Mg 3471<br>Mg 3288<br>Mg 3626<br>NCO 910<br>NCO 026 |
| Site 3<br>(search 1) | 3' 5'<br>C — G<br>G<br>N A<br>N<br>G — C<br>5' 3' | 1                               | 0                                         | 0                                    | -                                                                                                                    | -                                                                                                                                                     |                                                                                    |
| Site 3<br>(search 2) | 3' 5'<br>N — N<br>G<br>N A<br>N<br>N — N<br>5' 3' | 1                               | 0                                         | 0                                    | -                                                                                                                    | -                                                                                                                                                     |                                                                                    |

|        |             |                 |         |    |             |                     |         |
|--------|-------------|-----------------|---------|----|-------------|---------------------|---------|
| Site 4 | 3' 5'       | 92              | 4       | 3  | <b>1FJG</b> | 1509-1511/1524-1526 | Mg 1592 |
|        | G — C       |                 |         |    | <b>3V2F</b> | 1767-1769/1983-1985 | Mg 3524 |
|        | U — G       |                 |         |    | <b>3U5H</b> | 1671-1673/1774-1776 | Mg 4578 |
| Site 5 | C — G       | 297             | 26      | 16 | <b>3U5H</b> | 272- 274/291-293    | Mg 4333 |
|        | 5' 3'       |                 |         |    | <b>3U5H</b> | 1379-1381/1424-1426 | Mg 3948 |
|        | 3' 5'       |                 |         |    | <b>3U5H</b> | 333-335/28-30       | Mg 4491 |
|        | G — C       |                 |         |    | <b>3U5H</b> | 2251-2253/2263-2265 | Mg 4458 |
|        | A — U       |                 |         |    | <b>3U5H</b> | 2670-2672/2682-2684 | Mg4118  |
|        | G — C       |                 |         |    | <b>1S72</b> | 116-118/122-124     | Mg 8039 |
|        | 5' 3'       |                 |         |    | <b>3U5F</b> | 1478-1480/1527-1529 | Mg 2087 |
|        |             |                 |         |    | <b>3IVK</b> | 72-74/83-85         | Mg 137  |
|        |             |                 |         |    | <b>3V2F</b> | 1277-1279/1291-1293 | Mg 3500 |
|        |             |                 |         |    | <b>3T4B</b> | 309-311/325-327     | Ni 1015 |
|        |             |                 |         |    | <b>3CUN</b> | 66-68/78-80         | Mg 506  |
|        |             |                 |         |    | <b>397D</b> | 26-28/37-39         | Ca 49   |
|        |             |                 |         |    | <b>2XZM</b> | 266-268/275-277     | Mg 43   |
|        |             |                 |         |    | <b>2ZJR</b> | 1666-1668/1989-1991 | Mg 2901 |
|        |             |                 |         |    | <b>4ENB</b> | 8-10/45-47          | Iri 104 |
|        | <b>1FJG</b> | 407-409/433-435 | Mg 1609 |    |             |                     |         |

<sup>a</sup> N are undefined nucleotides and R are purines

<sup>b</sup> See Experimental Procedures

<sup>c</sup> Refers to metal ion residue in the pdb files, where Mg is a magnesium ion, Na is a sodium ion, Ca is a calcium ion, NCO is a cobalt hexamine ion, Ni is a nickel ion and Iri is a iridium hexamine ion.
